# Supplementary material for: Atomic-scale synthesis of nanoporous gallium–zinc oxynitride-reduced graphene oxide photocatalyst with tailored carrier transport mechanism
Source: Royal Society of Chemistry journal article supplement (doi:10.1039/d0ra01725f), 2020-01-01
Supplement: d0ra01725f1.pdf [file d0ra01725f1.pdf]

# Atomic–Scale Synthesis of Nanoporous Gallium–Zinc Oxynitride–Reduced Graphene Oxide Photocatalyst with Tailored Carrier Transport Mechanism

Babak Adeli<sup>1</sup> and Fariborz Taghipour<sup>1,2\*</sup>

<sup>1</sup>Department of Chemical and Biological Engineering, University of British Columbia, Vancouver, Canada

<sup>2</sup>Clean Energy Research Centre (CERC), University of British Columbia, Vancouver, Canada

---

\*Email [fariborz.taghipour@ubc.ca](mailto:fariborz.taghipour@ubc.ca)

Scanning electron microscopy (SEM) and transmission electron microscopy (TEM) images of the prepared graphene oxide (GO) nanosheets

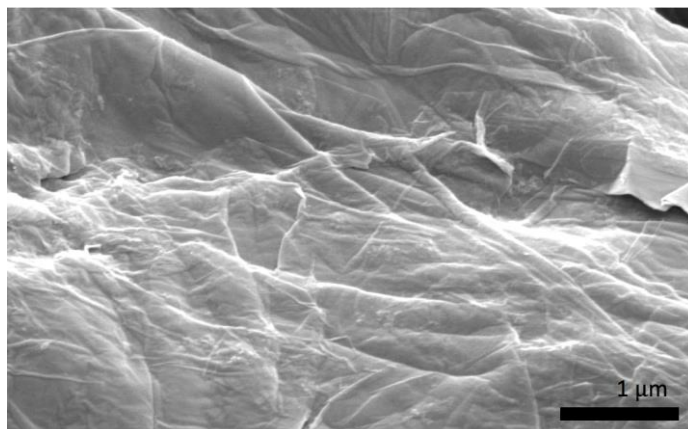

**Figure S1:** SEM image of the GO nanosheet prepared through modified Hummers method using pre-exfoliated graphite as the starting material.

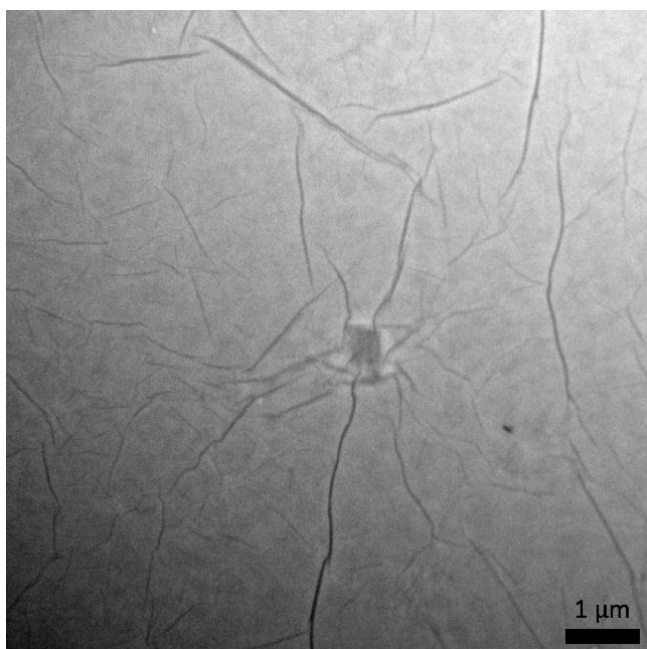

**Figure S2:** TEM image of a monolayer GO nanosheet prepared through modified Hummers method using pre-exfoliated graphite as the starting material.
